# Supplementary material
Source: publisher site journal article supplement (https://www.dovepress.com/article/267972)
Supplement: Supplementary file 1 [file get_supplementary_file.php]

**Supplemental Materials**

**Table S1.** Sex-specific MSS quartile cut-off values based on 7-item somatosensory score.

|  | Q1 | Q2 | Q3 | Q4 |
| --- | --- | --- | --- | --- |
| Men | ≤ 15 | 16 - 17 | 18 - 20 | > 20 |
| Women | ≤ 16 | 17 - 19 | 20 - 22 | > 22 |

**Table S2.** Demographic information (mean. SD or %) of subjects who met the analyses criteria versus those excluded due to incomplete data.

|  | Study cohort  N = 465 | Excluded cohort  N = 26 |
| --- | --- | --- |
| Age (yrs) | 26.2 (7.7) | 21.8 (3.0) |
| BMI (kg/m2) | 24.6 (3.8) | 24.9 (4.3) |
| Female (%) | 50.8% | 50.0% |
| Caucasian (%) | 86.9% | 76.9% |

**Table S3.** Comparison of age, sex and MSS scores (mean, SD or %) between observed and missing data (with n > 10) cohorts by pain sensitivity variable from the overall study cohort (n=465).

|  | Observed data cohorts | | | | | Missing data cohorts | | | | |
| --- | --- | --- | --- | --- | --- | --- | --- | --- | --- | --- |
|  | **N** | **Age (yrs)** | **F (%)** | **BMI (kg/m2)** | **MSS** | **N** | **Age (yrs)** | **F (%)** | **BMI (kg/m2)** | **MSS** |
| Muscle pain  (Saline: 40ml/h) | 420 | 26.3 (7.8) | 50.2% | 24.7 (3.9) | 18.1 (4.2) | 45 | 25.4 (7.3) | 55.6% | 23.6 (3.0) | 20.1 (3.8) |
| Muscle pain  (Saline: 80ml/h) | 361 | 26.6 (7.9) | 51.0% | 24.7 (3.9) | 18.0 (4.3) | 104 | 25.0 (7.1) | 50% | 24.3 (3.7) | 19.2 (3.6) |
| Muscle pain  (Acidic: 40ml/h) | 431 | 25.9 (7.5) | 50.4% | 24.6 (3.8) | 18.3 (4.2) | 34 | 30.4 (9.7) | 55.9% | 24.3 (4.0) | 18.1 (4.3) |
| Muscle pain  (Acidic: 80ml/h) | 329 | 26.7 (7.8) | 51.4% | 24.6 (3.8) | 18.0 (4.4) | 136 | 25.0 (7.3) | 49.3% | 24.6 (3.9) | 18.9 (3.8) |
| PPT deltoid | 198 | 25.6 (8.0) | 52.0% | 24.4 (3.6) | 17.9 (4.5) | 267 | 26.0 (7.5) | 49.8% | 24.8 (4.0) | 18.6 (4.0) |
| HPT thumb | 168 | 26.0 (7.7) | 52.4% | 24.2 (3.5) | 18.1 (4.6) | 297 | 26.3 (7.7) | 49.8% | 24.9 (4.0) | 18.4 (4.0) |
| TSP Pressure | 200 | 26.6 (8.0) | 51.5% | 24.4 (3.6) | 17.9 (4.5) | 265 | 26.0 (7.5) | 50.2% | 24.8 (4.0) | 18.6 (4.0) |
| TSP Punctate | 168 | 26.0 (7.7) | 52.4% | 24.2 (3.5) | 18.1 (4.6) | 297 | 26.3 (7.7) | 49.8% | 24.9 (4.0) | 18.4 (4.0) |
| TSP Heat | 167 | 26.0 (7.8) | 52.1% | 24.2 (3.5) | 18.1 (4.6) | 298 | 26.3 (7.7) | 50% | 24.9 (4.0) | 18.4 (4.0) |
| CPM Pressure | 199 | 26.5 (7.9) | 51.8% | 24.4 (3.6) | 17.9 (4.5) | 266 | 26.0 (7.6) | 50% | 24.8 (4.0) | 18.6 (4.0) |
| CPM Heat | 166 | 26.0 (7.7) | 52.4% | 24.1 (3.5) | 18.1 (4.6) | 299 | 26.4 (7.7) | 49.8% | 24.9 (4.0) | 18.4 (4.0) |

Note: PPT = Pressure pain threshold; HPT = heat pain threshold; TSP = temporal summation of pain; CPM = Conditioned pain modulation. Those with missing data were generally similar to those with observed data, in terms of age, sex, and MSS score.

**Table S4**. Median (IQR) values for pain sensitivity measures overall and by sex.

| Pain Sensitivity Measures | ALL | | | | | Women | | | Men | | M vs. F | |
| --- | --- | --- | --- | --- | --- | --- | --- | --- | --- | --- | --- | --- |
| N | Outliers (N,%) | Adj N | Median  (IQR) | N | | Median  (IQR) | N | | Median  (IQR) | Unadj.  p-value | Adj.  p-value |
| Muscle pain  Saline 40ml/h | 420 | 0, 0% | 420 | 1.0  (0.5, 2.0) | 211 | | **1.0**  **(0.3, 2.0)** | 209 | | **1.3**  **(0.5, 2.2)** | **0.01** | **0.04** |
| Muscle pain  Saline 80ml/h | 361 | 0, 0% | 361 | 1.6  (05, 3.0) | 184 | | 1.5  (0.5, 3.0) | 177 | | 1.6  (0.5, 3.0) | 0.052 | 0.17 |
| Muscle pain  Acidic 40ml/h | 431 | 10, 2.3% | 421 | 2.5  (1.5, 3.5) | 212 | | 2.5  (1.5, 3.75) | 209 | | 2.5  (1.5, 3.5) | 0.38 | 0.62 |
| Muscle pain  Acidic 80ml/h | 329 | 10, 3.0% | 319 | 3.0  (2.0, 4.75) | 165 | | 3.0  (2.0, 4.75) | 154 | | 3.0  (2.2, 4.5) | 0.66 | 0.83 |
| PPT ant tibialis | 462 | 12, 2.6% | 450 | 364.7  (274.5, 494.5) | 230 | | **323.0**  **(249.3, 416.9)** | 220 | | **411.3**  **(308.7, 543.3)** | **< 0.001** | **0.0007** |
| PPT web space | 463 | 0, 0% | 463 | 237.4  (174.8, 316.0) | 236 | | 231.4  (173.2, 307.7) | 227 | | 237.8  (175.5, 327.8) | 0.83 | 0.83 |
| PPT deltoid | 198 | 0, 0% | 198 | 285.8  (205.7, 363.3) | 103 | | **221.7**  **(186.3, 301.3)** | 95 | | **340.3**  **(262.3, 414.3)** | **< 0.001** | **0.0007** |
| HPT thumb | 168 | 0, 0% | 168 | 46.1  (44.6, 47.7) | 88 | | 45.8  (44.8, 47.3) | 80 | | 46.3  (44.4, 48.1) | 0.07 | 0.18 |
| TSP Pressure | 200 | 6, 3% | 194 | 0.5 (0, 1.0) | 100 | | 0.5 (0, 1.0) | 94 | | 0.5 (0, 1.0) | 0.34 | 0.62 |
| TSP Punctate | 168 | 3, 1.7% | 165 | 0.5 (0, 1.0) | 86 | | 0.5 (0, 1.0) | 79 | | 0.5 (0, 1.0) | 0.53 | 0.77 |
| TSP Heat | 167 | 4, 2.4% | 163 | 0 (0, 1.0) | 84 | | 0.1 (0, 1.0) | 79 | | 0 (0, 1.0) | 0.21 | 0.46 |
| CPM Pressure | 199 | 5, 2.5% | 194 | 31.0  (-2.0, 67.0) | 102 | | 30.2  (-1.3, 59.7) | 92 | | 31.5  (-9.5, 70.5) | 0.75 | 0.83 |
| CPM Heat | 166 | 0, 0% | 166 | 0.9  (0.2, 1.6) | 87 | | 0.9  (0.2, 1.6) | 79 | | 1.03  (0.2, 1.6) | 0.79 | 0.83 |

Notes: ANCOVA was used to measure the differences of pain sensitivity measures between women and men, adjusting for age, BMI and neuroticism using transformed data to achieve normal distribution of residuals. PPT, pressure pain threshold; HPT, heat pain threshold; TSP, temporal summation of pain; CPM, conditioned pain modulation. The significant differences of pain sensitivity measures between men and women are highlighted in bold (p<0.05).

**Table S5**. Sex differences in pain sensitivity incidence using adjusted odds ratios (ORs) and their associated 95% confidence intervals (95% CI) for: presence of referred pain (pain > 0 at foot/ankle region), presence of TS (+), and the absence of CPM (-), after adjusting for Neuroticism, BMI and age in the model.

| Pain Sensitivity Measures | N | Overall  Incidence  (%) | ORs (95% CI)  by sex | |
| --- | --- | --- | --- | --- |
| M | F |
| Referred pain  (Saline: 40ml/h) | 420 | 45.5 % | Ref | 1.0 (0.7, 1.5) |
| Referred pain  (Saline: 80ml/h) | 361 | 57.1% | Ref | 1.1 (0.7, 1.7) |
| Referred pain  (Acidic: 40ml/h) | 431 | 68.9% | Ref | **1.7 (1.1, 2.6) *** |
| Referred pain  (Acidic: 80ml/h) | 329 | 78.4% | Ref | **2.1 (1.2, 3.7) *** |
| Pressure TSP (+) | 200 | 61.0% | Ref | 0.7 (0.4, 1.3) |
| Punctate TSP (+) | 168 | 64.9% | Ref | 1.0 (0.5, 2.0) |
| Heat TSP (+) | 167 | 46.1% | Ref | 1.6 (0.8, 3.0) |
| Pressure CPM (-) | 199 | 71.9% | Ref | 0.8 (0.4, 1.6) |
| Heat CPM (-) | 166 | 78.9% | Ref | 0.9 (0.4, 2.0) |

† Referred pain incidence = Anterior ankle pain > 0; presence of TSP (+) = Change in pain > 0; Absence of CPM (-) = Change in test stimuli (pain thresholds) ≤ 0. Note: The ORs for women relative to men were computed using multiple logistic regressions with sex as a categorical variable, with adjustment for neuroticism, age, and body mass index (BMI). * The significant ORs are highlighted in bold (p<0.05)

**Table S6**. Effect size estimates (95% CI) comparing the 4th (Q4) versus 1st (Q1) MSS sex-specific quartiles, and regression coefficients of somatosensory MSS scores (continuous variable), controlling for Neuroticism, BMI, age and sex.

| Pain Sensitivity  Measures |  |  |  |  | MSS sex-quartiles  (Q4 vs Q1) | | MSS total score | | | |
| --- | --- | --- | --- | --- | --- | --- | --- | --- | --- | --- |
| N | Outliers (N, %) | | Adj N | Raw P | Adj P | Effect size  (95%CI) | R2 | β | P-trend |
| Muscle pain  (Saline: 40ml/h) | 420 | 0, 0% | | 420 | 0.03 | 0.06 | 0.31 (0.03, 0.59) | **0.05** | **0.008** | **0.03** |
| Muscle pain  (Saline: 80ml/h) # | 361 | 0, 0% | | 361 | M 0.62 | 0.72 | 0.11 (-0.31, 0.53) | 0.04 | 0.009 | 0.44 |
| F 0.01 | 0.051 | 0.56 (0.13, 0.99) | 0.10 | 0.02 | 0.08 |
| Muscle pain  (Acidic: 40ml/h) | 431 | 10, 2.3% | | 421 | **0.003** | **0.01** | **0.43 (0.15, 0.71)** | **0.04** | **0.02** | **0.007** |
| Muscle pain  (Acidic: 80ml/h) | 329 | 10, 3.0% | | 319 | 0.07 | 0.18 | 0.30 (-0.02, 061) | 0.04 | 0.01 | 0.13 |
| PPT- anterior tibialis | 462 | 12, 2.6% | | 450 | **0.0001** | **0.0003** | **0.54 (0.27, 0.81)** | **0.10** | **-0.02** | **0.0006** |
| PPT- web space | 463 | 0, 0% | | 463 | **0.002** | **0.007** | **0.43 (0.17, 0.70)** | **0.06** | **-0.02** | **0.004** |
| PPT- deltoid # | 198 | 0, 0% | | 198 | M 0.01 | 0.10 | -0.78 (-1.41, -0.15) | **0.10** | **0.02** | **0.03** |
| F 0.27 | 0.47 | 0.31 (-0.23, 0.85) | 0.04 | -0.006 | 0.51 |
| HPT- thumb | 168 | 0, 0% | | 168 | 0.62 | 0.71 | 0.12 (-0.3, 0.54) | 0.06 | -0.0002 | 0.80 |
| TSP- Pressure | 200 | 6, 3% | | 194 | **0.007** | **0.03** | **0.57 (0.16, 0.98)** | **0.05** | **0.01** | **0.004** |
| TSP- Punctate | 168 | 3, 1.7% | | 165 | 0.81 | 0.81 | 0.06 (-0.37, 0.48) | 0.02 | -0.0009 | 0.89 |
| TSP- Heat | 167 | 4, 2.4% | | 163 | 1.0 | 1.0 | 0.0004 (-0.44, 0.44) | 0.03 | -0.0008 | 0.79 |
| CPM- Pressure | 199 | 5, 2.5% | | 194 | **0.002** | **0.01** | **0.67 (0.26, 1.09)** | 0.07 | **-3.02** | **0.002** |
| CPM- Heat | 166 | 0, 0% | | 166 | 0.81 | 0.81 | -0.05 (-0.48, 0.37) | 0.02 | 0.02 | 0.49 |

Note: Differences between the 4th (highest sensitivity) and 1st (referent) MSS sex-quartile (Q4 versus Q1) were assessed using transformed variables as needed to achieve normal distribution of the residuals. MSS, multisensory sensitivity; PPT, pressure pain threshold; HPT, heat pain threshold; TSP, temporal summation of pain; CPM, conditioned pain modulation; M: male; F: female. The significant values are highlighted in bold (p<0.05). **#**No main effect of MSS quartile but significant sex interactions observed; thus, effect sizes for men and women are reported separately. Higher effect sizes indicate higher pain sensitivity for all pain assessments.

**Table S7.** Adjusted odds ratios (ORs) and their associated 95% confidence intervals (95% CI) for referred pain, the presence of TS (+), and the absence of CPM (-) according to MSS, controlling for Neuroticism, BMI, age and sex.

| Pain Sensitivity Measure | N | ORs (95% CI)  by MSS sex-quartiles | | | | ORs (95% CI)  by MSS total score | |
| --- | --- | --- | --- | --- | --- | --- | --- |
| Q1 | Q2 | Q3 | Q4 | per unit  change | P-value for trend |
| Referred pain  (Saline: 40ml/h) | 420 | Ref | 0.82  (0.49, 1.39) | 0.77  (0.45, 1.34) | 1.22  (0.68, 2.19) | 1.01  (0.96, 1.06) | 0.70 |
| Referred pain  (Saline: 80ml/h) | 361 | Ref | 1.31  (0.74, 2.32) | 1.18  (0.65, 2.15) | 1.88  (0.97, 3.64) | **1.07**  **(1.01, 1.13)** | **0.02** |
| Referred pain  (Acidic: 40ml/h) | 431 | Ref | 0.94  (0.54, 1.65) | 1.19  (0.66, 2.14) | 1.45  (0.76, 2.76) | 1.03  (0.98, 1.09) | 0.25 |
| Referred pain  (Acidic: 80ml/h) | 329 | Ref | 0.77  (0.39, 1.51) | **2.47**  **(1.02, 6.00)** | 1.04  (0.47, 2.30) | 1.04  (0.97, 1.11) | 0.26 |
| Pressure TSP (+) | 200 | Ref | 1.62  (0.77, 3.40) | **2.50**  **(1.05, 5.99)** | 1.68  (0.71, 3.98) | 1.06  (0.98, 1.13) | 0.15 |
| Punctate TSP (+) | 168 | Ref | 0.90  (0.39, 2.10) | 0.61  (0.25, 1.53) | 2.36  (0.84, 6.65) | 1.03  (0.95, 1.11) | 0.48 |
| Heat TSP (+) | 167 | Ref | 0.99  (0.43, 2.28) | 1.25  (0.51, 3.10) | 0.94  (0.38, 2.32) | 1.00  (0.93, 1.08) | 0.92 |
| Pressure CPM (-) | 199 | Ref | **4.32**  **(1.67, 11.17)** | **3.06**  **(1.08, 8.70)** | **7.95**  **(2.81, 22.47)** | **1.14**  **(1.05, 1.24)** | **0.001** |
| Heat CPM (-) | 166 | Ref | **4.24**  **(1.45, 12.40)** | 2.64  (0.80, 8.68) | 1.40  (0.38, 2.18) | 1.03  (0.94, 1.13) | 0.54 |

Note: The ORs between groups were computed using multiple logistic regressions with MSS sex-quartiles as a categorical variable. The ORs per unit of MSS scores were computed with somatosensory total scores as a continuous variable. MSS, multisensory sensitivity; PPT, pressure pain threshold; HPT, heat pain threshold; TS, temporal summation; CPM, conditioned pain modulation. Q4 is the 4th MSS quartile indicating the highest sensory sensitivity and Q1 is the 1st MSS quartile indicating the lowest sensory sensitivity. The significant values are highlighted in bold (p<0.05).
